# Supplementary material for: How critical is SME financial literacy and digital financial access for financial and economic development in the expanded BRICS block?
Source: Front Big Data. 2024 Dec 19;7:1448571. doi: 10.3389/fdata.2024.1448571 (PMC11693673; doi:10.3389/fdata.2024.1448571)
Supplement: Supplementary file 1 [file Table_1.xlsx]

## Sheet: Sheet1
			Y1	LnY1	Y2	Financial knowledge (K) score (0-7, high)	Financial behavior (B) score (0-9, high)	Financial attitudes (A) score (0-3, high)	Financial literacy (FL)score (1-21, high)	Adults who actively budget/ keep track of their money (%)	Adults who shop around for financial products (%)	Adults who understand simple and compound interest (%)	Adults who understand the relationship between risk and return (RR) (%)	Adults who understand inflation (%)	Adults who understand RD (risk diversification) (%)	Outstanding loans with commercial banks	Commercial Bank - SME Loan Accounts	Non-Deposit MFI Loan Accounts	# of commercial bank branches per 1000 Km2	# of MFI branches per 1000 Km2	# of commercial bank branches per 100,000 Adults	# of MFI branches per 100,000 Adults	# of loan accounts from all MFI per 1000 adults	# of branches of other deposit takers (ODT) per 100,000 Adults	SME deposit accounts (as a % of non-financial corporation (NFC) borrowers)	SME loan accounts (as a % of NFC borrowers)	Outstanding SME Loan - Commercial Banks	SMEs with an outstanding loan or line of credit (%)	SMEs with a male owner with an account at a formal financial institution (%)	SMEs with an account at a formal financial institution (%)	SMEs with at least one female owner with an outstanding loan or line of credit (%)	SMEs with at least one female owner with an account at a formal financial institution (%)	SMEs with outstanding credit who are required to provide collateral on loans (%)	SMEs with at least one female owner with outstanding credit who are required to provide collateral on loans (%)	SMEs with a male owner with outstanding credit who are required to provide collateral on loans (%)	# credit cards per 1000 adults	# debit cards per 1000 adults	# of ATMs per 1000 Km2	# of ATMs per 100,000 Adults	Registered mobile money agents (MMA) per 100,000 adults	Value of Mobile & Internet Bank Transactions (during reference year) (%GDP)	Value of MMA Transactions (during reference year) (%GDP)	Average # of MMA Transactions per active MMA	Mobile Money Deployment (# of active services)	Mobile Money regulatory index (0-100)	EC	PE	CPI
		Extended BRICS DUMMY	GDP-PER CAP-AAGR (%)	Ln GDP per capita (2015 Constant)	FINANCIAL DEVELOPMENT-FD	1.1	1.2	1.3	1.4	1.5	1.6	1.7	1.8	1.9	1.1	2.1A	2.2A	2.3A	2.4B	2.5B	2.6B	2.7B	2.8B	2.9B	2.10C	2.11C	2.12C	2.13C	2.14C	2.15C	2.16D	2.17D	2.18E	2.19E	2.20E	3.1	3.2	3.3	3.4	3.5	3.6	3.7	3.8	3.9	3.1	ECONOMIC CRISIS EVENTS	PANDEMIC EVENTS	INFLATION
						K	B	A	FL	PERSONAL FINANCE AWARENESS			RR	INF	RD	A. BREADTH OF FINANCIAL INSTITUTIONS			B. DEPTH OF FINANCIAL INSTITUTIONS-BRANCHES						C. SME ACCESS TO CREDIT						D. FEMALE SME SHARE		E. SME CREDIT LIMITATIONS			CC	DC	ATM		MMA	DIGITAL TRANSACTIONS				REG
						X1 FINANCIAL LITERACY										X2 SME CREDIT FINANCING																				X3 Digital Money - Service & Regulation										MACRO FACTORS & EVENTS
ARG	2004	1	7.93	26.7145	0.291074														1.36881		13.3157			0.163513			3172.73									298.83	426.979	0.190741	1.85552							0	1	4.41
ARG	2005	1	7.73	26.7993	0.318134														1.36808		13.1252			0.322521			4980.85									371.653	447.802	0.216685	2.07886							0	0	9.64
ARG	2006	1	6.93	26.8767	0.335046														1.38671		13.1189			0.318035			6020.41									468.374	465.332	0.301459	2.85194							0	1	10.9
ARG	2007	1	7.92	26.9629	0.333709														1.40023		13.0662			0.358026			8641.41									546.178	518.874	0.526183	4.91007							1	0	8.83
ARG	2008	1	3.03	27.0027	0.344845														1.41229		12.9998			0.346437			15097.1									582.531	548.613	1.07502	9.89532							1	0	8.58
ARG	2009	1	-6.87	26.9417	0.308698														1.41667		12.8596			0.34164			16856.3									662.302	625.216	1.51168	13.722							1	0	6.27
ARG	2010	1	9.01	27.0382	0.266112														1.43787		12.9738			0.24398			25098.8									702.72	638.175	2.12629	19.1854							0	1	10.46
ARG	2011	1	4.93	27.0965	0.273852														1.47002		13.0731			0.240469			36041.9									772.763	780.025	3.02519	26.9033							0	0	9.78
ARG	2012	1	-2.04	27.0861	0.276224											276873	630889		1.49926		13.1486			0.237143			58440.9									898.96	861.503	3.91458	34.3312		3.98554			0		0	0	10.04
ARG	2013	1	1.35	27.1099	0.300715											363104	1094892		1.52155		13.1656			0.237132		52.1701	90299.8									975.989	944.849	4.97828	43.0759		5.62294			0		0	0	10.62
ARG	2014	1	-3.5	27.0845	0.301742											475218	1167170		1.53909		13.1425			0.234019		75.9877	105012									972.47	1133.44	5.31408	45.3779		6.8756			1		0	0	21.36
ARG	2015	1	1.7	27.1114	0.288389											577027	422544		1.56284		13.1739			0.231013		78.314	148286									1062.15	1166	5.60056	47.2097		8.94471			1		0	1	21.49
ARG	2016	1	-3	27.0904	0.307102											784802	463024		1.60522		13.3617			0.273744		36.3064	195922									1132.25	1250.12	6.00799	50.0099		10.8333			1		0	1	40.5
ARG	2017	1	1.92	27.1182	0.326638											1.02521e+06	502654		1.63628		13.4495			0.285329		86.9228	301293									1205.95	1357.97	6.41761	52.7499		14.6455			1		0	0	25.66
ARG	2018	1	-3.4	27.0917	0.319114	4.0542	4.37317	2.94367	11.371	38.5443	28.1224	8.10587	67.9074	91.2324	59.4706	1.55208e+06	678969		1.6498		13.3858			0.287579		48.1001	375720	40.3305	98.7884	99.0583	40.4489	99.244	46.6461	49.7508	42.5815	1244.93	1418.29	7.21529	58.5416		14.5153			2		0	0	34.15
ARG	2019	1	-2.73	27.0714	0.275159											2.05494e+06	736445		1.66515		13.3321			0.280861		53.8391	367933									1214.02	1420.43	7.52149	60.2213		17.083			2		0	1	52.8
ARG	2020	1	-10.52	26.9672	0.308573											2.39368e+06	1005572		1.65528		13.0765			0.291551		56.5563	622537									1204.71	1649	7.82478	61.8147		26.5263			2	77.67	0	1	40.48
ARG	2021	1	9.81	27.069	0.306052											3.12129e+06	1000130		1.6604		12.9424			0.293369		61.4003	1.04201e+06									1069.42	1859.74	7.98446	62.237		29.5272			2	77.67	1	1	47.1
ARG	2022	1	4.86	27.1174												4.4087e+06	1270440		1.66771		12.8288			0.28952		63.1137	1.83319e+06									1114.67	2122.83	8.02137	61.7042		33.621			2	77.67	1	0	73.13
AUT	2004	0	2.09	26.529	0.65883														11.5608		13.9364			21.0214												311.41	966.926	96.413	116.224							0	1	1.96
AUT	2005	0	1.55	26.5512	0.678493														11.1609		13.3287			20.9266												314.751	969.626	89.4692	106.847							0	0	2.1
AUT	2006	0	2.94	26.5852	0.710504														11.0519		13.0949			20.4895												330.829	999.548	91.4445	108.349							0	1	1.69
AUT	2007	0	3.39	26.6218	0.729966														10.9428		12.8832			20.5732												343.903	1026.79	92.2685	108.63							1	0	2.2
AUT	2008	0	1.14	26.6362	0.742218														10.7489		12.5775			20.3481												357.502	1063.23	94.1953	110.22							1	0	3.23
AUT	2009	0	-4.02	26.5979	0.665108														10.1188		11.777			19.9151												357.433	1102.51	96.619	112.453							1	0	0.41
AUT	2010	0	1.59	26.6161	0.662382														9.75521		11.3006			20.341												372.764	1137.72	97.6006	113.062							0	1	1.69
AUT	2011	0	2.57	26.6449	0.655921											99038.5			13.1483		15.1488			19.9936												378.6	1159.2	98.9215	113.972							0	0	3.54
AUT	2012	0	0.22	26.6517	0.623173											97057.9			13.9724		15.9957			19.4085												395.979	1187.47	101.151	115.799							0	0	2.57
AUT	2013	0	-0.56	26.6519	0.61651											92569.4			13.6937		15.5633			18.6485												410.024	1220.75	103.333	117.441							0	0	2.12
AUT	2014	0	-0.12	26.6585	0.604587											89725			13.1847		14.8556			18.1325												429.062	1231.56	165.657	186.65		679.557					0	0	1.47
AUT	2015	0	-0.11	26.6686	0.606478											90076.4			12.4091		13.8263			17.6339												434.237	1233.95	164.845	183.671		661.064					0	1	0.81
AUT	2016	0	0.89	26.6883	0.620333											91309			11.5002		12.685			16.9623												439.856	1343.68	148.049	163.3		654.281					0	1	0.97
AUT	2017	0	1.55	26.7106	0.606902											91025.6			11.0276		12.0864			16.6287												451.135	1300.9	150.909	165.397		656.642					0	0	2.23
AUT	2018	0	1.93	26.7346	0.629184											93896.6			10.967		11.9636			16.1013												471.322	1326.55	155.538	169.671		689.444					0	0	2.12
AUT	2019	0	1.07	26.749	0.611942	5.3179	5.9642	3.0961	14.3781	70.66	19.32	49	91.7	88.9	61.3	97289.9			10.9428		11.8832			15.7389												479.474	1333.01	158.422	172.036		738.335					0	1	1.49
AUT	2020	0	-6.75	26.6804	0.617015											95959			6.85894		7.41561			15.2636												483.919	1515.45	155.332	167.939		785.175					0	1	1.39
AUT	2021	0	4.39	26.7219	0.658387											104843			11.4639		12.3379			14.255				41.8943990769735	100	100	44.3775711198672	100	50.4189214359065	52.7356708138767	48.9267486362087	475.768	1396.96	156.617	168.556		907.568					1	1	2.76
AUT	2022	0	4.49	26.7688															10.8095		11.521			13.7038												439.977	1402.46	165.487	176.38		809.212					1	0	8.61
BRA	2004	1	4.56	27.9132	0.470719														2.9905	0.0111269	18.699	0.0695744		0.233411														16.6852	104.329							0	1	6.6
BRA	2005	1	2.06	27.9447	0.492213														3.02998	0.0126822	18.6062	0.0778778		0.241715												309.581	306.446	17.5631	107.85							0	0	6.87
BRA	2006	1	2.85	27.9836	0.522828														3.05702	0.0126822	18.4486	0.0765351		0.270761												378.067	349.445	17.6517	106.525							0	1	4.18
BRA	2007	1	4.98	28.0425	0.594051													8540	3.12019	0.0119644	18.5172	0.0710043	0.0606377	0.279047												471.822	378.001	18.3249	108.752							1	0	3.64
BRA	2008	1	4.06	28.0922	0.600057													5972	3.27058	0.0105287	19.0969	0.0614766	0.0417203	0.365367												518.575	482.409	19.0579	111.279							1	0	5.68
BRA	2009	1	-1.07	28.0909	0.600043													6351	3.32347	0.0105287	19.0993	0.0605062	0.0436676	0.39329												524.04	501.17	19.8129	113.861		232.443					1	0	4.89
BRA	2010	1	6.52	28.1635	0.613942													5446	3.28638	0.0102894	18.5913	0.0582077	0.0368604	0.39121												561.893	528.711	20.7823	117.567		253.92					0	1	5.04
BRA	2011	1	3.01	28.2025	0.603856											1.48043e+06		6166	3.43162	0.0102894	19.1135	0.0573098	0.0410898	0.390507												522.463	566.076	20.8018	115.862		262.087			0		0	0	6.64
BRA	2012	1	1.01	28.2215	0.627169											1.75738e+06		35129	3.70657	0.0101697	20.3339	0.0557902	0.230571	0.364934												509.623	546.41	20.9543	114.953		368.038			0		0	0	5.4
BRA	2013	1	2.11	28.2511	0.624513											2.07578e+06		40904	3.78577	0.00945186	20.4625	0.0510885	0.264522	0.3712												528.447	583.964	21.8395	118.045		369.529			0		0	0	6.2
BRA	2014	1	-0.35	28.2561	0.627339											2.33801e+06		89248	3.97349	0.0130412	21.1709	0.0694837	0.568925	0.355068												529.766	641.673	22.0678	117.578		369.414			0		0	0	6.33
BRA	2015	1	-4.36	28.22	0.624556											2494749		102848	3.95746	0.0132805	20.7998	0.0698001	0.646739	0.339568												535.408	607.641	21.8204	114.685		369.12			0		0	1	9.03
BRA	2016	1	-4.06	28.1867	0.620659											2446374		263714	3.91044	0.0135198	20.2855	0.0701342	1.63676	0.381083												518.432	628.624	21.5538	111.811		355.135			1		0	1	8.74
BRA	2017	1	0.52	28.1999	0.621775	4.3156	4.62259	3.12901	12.0672	36.1196	53.6474	17.9331	84.3465	58.3587	77.2543	2406964		277790	3.79905	0.0136394	19.4613	0.0698702	1.70256	0.319319												505.771	662.61	21.0071	107.612		382.51			1		0	0	3.45
BRA	2018	1	0.98	28.2175	0.642898											2.4911e+06		173943	3.74174	0.0147162	18.9416	0.074497	1.05352	0.325849												631.777	702.547	21.0059	106.337		395.241			1	80.13	0	0	3.66
BRA	2019	1	0.45	28.2297	0.662894											2.62787e+06		201452	3.73038	0.0172287	18.6699	0.086227	1.20629	0.326345												735.574	792.426	20.4931	102.565		384.321			1	88	0	1	3.73
BRA	2020	1	-4.52	28.1964	0.666647											3149438		158491	3.62174	0.0128019	17.9355	0.0633971	0.939054	0.258329												801.299	988.659	19.4701	96.4193		380.608			1	88	0	1	3.21
BRA	2021	1	4.07	28.2451	0.661758											3.62947e+06		177369	3.49252	0.0136394	17.1407	0.0669398	1.0415	0.252492												1047.34	1001.2	19.44	95.4081		448.968			1	88	1	1	8.3
BRA	2022	1	2.43	28.2736														333997	3.39824	0.012084	16.5454	0.058835	1.94561	0.251068												1219.56	1004	20.1152	97.9375		510.877					1	0	9.28
CHN	2004	1	9.44	29.0094	0.42939																																									0	1	3.83
CHN	2005	1	10.71	29.1173	0.424275																																									0	0	1.78
CHN	2006	1	12.02	29.237	0.4697																																1020.1	10.7436	9.59944							0	1	1.65
CHN	2007	1	13.5	29.3701	0.518223																																1320.96	13.5366	11.9691							1	0	4.82
CHN	2008	1	8.94	29.4622	0.484102																						7.71313e+06										1541.87	17.7713	15.5758							1	0	5.91
CHN	2009	1	8.67	29.552	0.516833																						1.01566e+07										1735.15	22.7997	19.8324							1	0	-0.73
CHN	2010	1	9.89	29.6531	0.519434											4.10234e+07											1.25555e+07										2003.97	28.7631	24.851							0	1	3.18
CHN	2011	1	8.83	29.7443	0.514992											4.68481e+07											1.5536e+07	21.7617525218682	96.420753027451	95.6283734673683	22.678966636006	95.187558646688	77.0778026686824	73.2417280223253	84.0957319223656		2425.35	35.4164	30.3888							0	0	5.53
CHN	2012	1	7.12	29.82	0.550637											5.26494e+07			9.07838		7.73406			5.27647			1.88982e+07										2895.27	44.0928	37.5635							0	0	2.61
CHN	2013	1	7.02	29.8948	0.559868											5.87546e+07			9.22172	0.83175	7.80603	0.704063		5.88893			2.08247e+07										3433.64	55.1737	46.7036							0	0	2.57
CHN	2014	1	6.72	29.9665	0.591823											6.74404e+07			9.5499	0.932762	8.03634	0.784928		6.5505			2.33575e+07										4000.98	65.241	54.901							0	0	2.05
CHN	2015	1	6.39	30.0345	0.623438											7.53344e+07			10.1722	0.973081	8.50994	0.814068		7.18716			2.52249e+07										4447.15	91.9616	76.934							0	1	1.54
CHN	2016	1	6.23	30.1007	0.637799	4.73509	6.2131	3.11828	14.0665	72.043	69.306	42.3265	74.3891	77.1261	57.478	8.38709e+07			10.5735	0.94316	8.79413	0.78444		8.08249			2.68682e+07										4994.86	98.0589	81.557							0	1	2.12
CHN	2017	1	6.31	30.1679	0.629589											95189222			10.6374	0.933186	8.80003	0.772002		8.57216	86.4798789079846		2.99509e+07									515.766	5358.81	101.92	84.3158							0	0	1.52
CHN	2018	1	6.24	30.2332	0.636912											1.07411e+08			10.7718	0.882574	8.86813	0.726599		9.00807	86.6192250029151		32687096									599.239	6036.94	117.86	97.0313							0	0	1.93
CHN	2019	1	5.59	30.291	0.63109											1.21329e+08			10.8017	0.818381	8.84728	0.670305		9.25174	86.2591325214617		3.66021e+07									648.318	6668.29	116.471	95.3966							0	1	2.9
CHN	2020	1	2.02	30.3132	0.6743											1.3599e+08			10.7653	0.769786	8.77114	0.62719		9.37897			4.22399e+07									672.575	7068.96	107.579	87.6509							0	1	2.49
CHN	2021	1	8.04	30.3943	0.633903														10.83	0.698059	8.77777	0.565778		9.45965			4.79757e+07									687.981	7264.22	100.566	81.5085							1	1	0.85
CHN	2022	1	3	30.4237															10.9091	0.644052	8.79797	0.519415		9.42708			5.60546e+07									682.855	7427.55	95.0693	76.6715							1	0	1.88
EGY	2004	1	2	26.0444	0.34178														1.85645		3.66023																	1.29389	2.55107							0	1	8.15
EGY	2005	1	2.42	26.0881	0.421014														1.9117		3.67135																	1.67763	3.22184							0	0	8.71
EGY	2006	1	4.78	26.1543	0.369652														2.01517		3.77582																	2.28138	4.27462							0	1	4.29
EGY	2007	1	5.02	26.2228	0.372694														2.21709		4.05578																	2.85399	5.22087							1	0	10.88
EGY	2008	1	5.08	26.2919	0.434173														2.3959		4.28192																	3.48084	6.2209							1	0	11.74
EGY	2009	1	2.65	26.3376	0.400686														2.51545		4.3964																	4.22221	7.37942							1	0	16.16
EGY	2010	1	3.04	26.3878	0.316858														2.58275		4.41652																	4.84304	8.28161							0	1	11.66
EGY	2011	1	-0.46	26.4053	0.276345											433224			2.64403		4.41874																	5.28203	8.82741					0		0	0	11.05
EGY	2012	1	-0.06	26.4273	0.269313											465324			2.67015		4.36251																	6.02642	9.846					0		0	0	8.69
EGY	2013	1	-0.15	26.4489	0.255961											495163			2.71736		4.34138							5.18040142978566	56.8709	57.7155	13.0325	62.3621	92.1214	84.0472	97.0835			6.51766	10.4129					3		0	0	6.92
EGY	2014	1	0.53	26.4776	0.29299											567282			2.7696		4.32763																	7.32332	11.443					3		0	0	10.09
EGY	2015	1	2.1	26.5204	0.268318											791499			2.85599		4.37332															50.4676	189.085	8.48159	12.9877					3		0	1	10.99
EGY	2016	1	2.19	26.563	0.301427											1.30024e+06		1828782	2.98458	1.47672	4.47941	2.21634	27.5728					5.62326413559994	65.5857	66.7402	8.68811	72.6935	99.728	99.8779	99.6792	58.191	182.169	9.87694	14.8238			0.0842622		3		0	1	10.21
EGY	2017	1	2.13	26.6039	0.287153											1463380		2263336	3.12823	1.66759	4.60008	2.4522	33.4346													52.5198	200.566	11.3607	16.706			0.235236		3		0	0	23.53
EGY	2018	1	3.33	26.6559	0.289212											1.81458e+06		2781498	3.26486	1.97197	4.70654	2.84275	40.2807													57.5747	223.582	12.2558	17.6676			0.257169		3	67.63	0	0	20.85
EGY	2019	1	3.68	26.7099	0.298527											1.89057e+06		3113945	4.43317	2.43809	6.26844	3.44743	44.232													47.9418	246.075	13.3919	18.936	529.619		0.418156	40.9383	3	64.3	0	1	13.88
EGY	2020	1	1.79	26.7448	0.303408											2.49337e+06		3165950	4.59089	2.83088	6.36705	3.92612	44.1089					4.32920124048072	82.695	82.8063	5.65475	87.1423	95.2573	100	94.9436	53.8077	265.219	14.9862	20.7842	973.993	18.1005	1.43404	48.9818	3	80.55	0	1	5.7
EGY	2021	1	7.03	26.7772	0.308767											3.09903e+06		3495337	4.7024	4.20714	6.39918	5.72522	47.7832													61.1092	294.615	19.1009	25.9932	1014.65	21.6911	4.01507	47.5493	3	80.55	1	1	4.5
EGY	2022	1	2.33	26.841														3952496	4.68934	4.61299	6.26428	6.16229	53.041													67.1138	319.894	22.0754	29.4896		29.099	7.8097	63.7629			1	0	8.5
ETP	2004	1	7.75	23.7772	0.111992														0.295943		0.836457																	0.00708845	0.0200349							0	1	3.22
ETP	2005	1	8.32	23.8889	0.115973														0.334042	0.638845	0.913917	1.74784																0.00708843	0.0193935							0	0	11.65
ETP	2006	1	7.69	23.9918	0.116599														0.353531	0.665418	0.935635	1.76106																0.0115186	0.0304844							0	1	13.56
ETP	2007	1	5.79	24.1002	0.123531														0.419092	0.757555	1.07207	1.93788																0.0159485	0.0407976							1	0	17.24
ETP	2008	1	9.42	24.2027	0.115197														0.480254	0.74785	1.18712	1.84858																0.0274684	0.0678981							1	0	44.37
ETP	2009	1	9.98	24.2871	0.108285														0.547587	0.901125	1.30724	2.15123																0.0407589	0.0973023							1	0	8.48
ETP	2010	1	5.62	24.4053	0.115738														0.587469	0.941899	1.3528	2.16897																0.128481	0.295861							0	1	8.13
ETP	2011	1	7.58	24.5113	0.117415											63823			0.847972	1.0819	1.88152	2.40056						11.4349523086414	94.1467294055273	93.976417313573	11.6952738796694	95.019638648861	88.459238070472	96.7282839849501	89.2470502371974			0.141772	0.31457					0		0	0	33.23
ETP	2012	1	7.32	24.5942	0.131127											99148			1.35746	1.1129	2.9012	2.37853																0.213542	0.45639					0		0	0	24.13
ETP	2013	1	7.45	24.6948	0.132559																																							0		0	0	8.07
ETP	2014	1	4.68	24.7924	0.133527																																							0		0	0	7.4
ETP	2015	1	6.62	24.8913	0.128301																							29.6113422879866	91.9691297816229	92.1611025619	36.670327364269	92.452470494043	84.3870940276833	70.4921115537017	95.2052753297141									0		0	1	9.57
ETP	2016	1	4	24.9815	0.122216																																							0		0	1	6.63
ETP	2017	1	5.52	25.0728	0.116912																																							0		0	0	10.69
ETP	2018	1	3.28	25.1387	0.117898																																							0	79.59	0	0	13.83
ETP	2019	1	2.92	25.2191	0.112486																																							0	79.59	0	1	15.81
ETP	2020	1	1.64	25.2779	0.113671																																							0	88.35	0	1	20.35
ETP	2021	1	3.3	25.3328	0.115524											63824												11.4349523086414	94.1467294055273	93.976417313573	11.6952738796694	95.019638648861	88.459238070472	96.7282839849501	89.2470502371974									0		1	1	26.79
ETP	2022	1	-1.05	25.3846															7.95165	0.923291	12.0472	1.39884	15														411.596	6.1157	9.26561		21.0009	0.395606				1	0	33.94
IND	2004	1	6.43	27.6449	0.446535												1807000		22.7628		8.9593						712086																			0	1	3.83
IND	2005	1	6.09	27.7212	0.454761												1473000		23.165		8.91857						834980											5.93369	2.28448							0	0	4.4
IND	2006	1	1.63	27.7987	0.470881												1805000		23.4102		8.8217						1.01285e+06									29.3068	95.032	7.23903	2.72789							0	1	6.7
IND	2007	1	6.37	27.8725	0.448873												1817000		24.2077		8.93221						1.27323e+06									34.1867	127.131	9.11075	3.36171							1	0	6.2
IND	2008	1	7.01	27.9029	0.481534												4851000		25.553		9.2369						2.13539e+06									30.029	167.087	11.7971	4.26441							1	0	9.09
IND	2009	1	3.82	27.9786	0.508811												4851000		26.8856		9.52473						2.56128e+06									21.8422	216.825	14.9032	5.27973							1	0	12.31
IND	2010	1	4.06	28.0601	0.477919												8505000		28.6934		9.96289						3.62291e+06									21.0665	266.079	20.7969	7.22105							0	1	10.53
IND	2011	1	5.01	28.1112	0.444998											40756470	9302000	24841734	30.6132	3.33077	10.4186	1.13356	28.4354			9.01244	4785272									20.2033	318.536	25.811	8.78424					1		0	0	9.5
IND	2012	1	6.09	28.1643	0.422109											48032669	9858000	26753803	33.2061	3.06977	11.0793	1.02424	30.0234			8.92228	5276846									21.944	371.672	32.6656	10.899		0.0183025			3		0	0	10
IND	2013	1	6.72	28.2263	0.419497											5.52532e+07	11186052	30167380	35.8823	3.30487	11.7405	1.08133	33.1986				6872087									21.5191	364.475	38.9645	12.7489		0.0533231	0.00891027		4		0	0	9.4
IND	2014	1	6.98	28.2977	0.436201											6.28208e+07	12560205	3.26388e+07	39.7247	3.43772	12.7501	1.10337	35.2341				8.51092e+06	19.9488620143393	83.6664363284098	84.7867976827097	34.2127630245243	94.0455689843316	83.753138486217	79.0954892764542	84.6161255750519	20.7068	425.784	54.9006	17.6209		0.179806	0.023303		4		0	0	5.8
IND	2015	1	5.57	28.3747	0.439148											6.87847e+07	13824248	3.7544e+07	42.6401	3.28603	13.4287	1.03488	39.7681				9611741									22.3612	586.238	61.9331	19.5047		0.751752	0.0594244		4		0	1	4.9
IND	2016	1	5.3	28.454	0.445588											75226447	20405395	3.06647e+07	45.6167	3.04656	14.095	0.941354	31.8683				9964249									25.4671	687.502	67.9607	20.9991		2.62539	0.133736		4		0	1	4.5
IND	2017	1	2.68	28.5197	0.46088	3.65255	5.60869	2.63228	11.8935	54.4513	33.6559	15.0289	77.6292	73.1317	49.8177	7.91787e+07	23205419	28411321	47.3125	3.4051	14.3467	1.03254	28.9764				10701294									30.4358	786.997	71.8262	21.78		7.66807	0.311536		6		0	0	3.6
IND	2018	1	-7.48	28.5823	0.468011											8.76697e+07	25964108	36468531	48.006	3.96779	14.2992	1.18186	36.5353				11493538									37.5536	862.653	71.8599	21.4044		7.79831	0.575009		7	88.73	0	0	3.43
IND	2019	1	7.82	28.6203	0.467573											9.8976e+07	31808167	38783657	49.2579	4.14807	14.4248	1.21473	38.1997				13132312									46.3797	892.175	70.6635	20.6933		14.7158	0.911753	4.9284	7	87.07	0	1	4.76
IND	2020	1	5.84	28.5602	0.538758											1.05188e+08	38064521	39071998	50.5504	4.8194	14.567	1.38879	37.8693				1.41378e+07									55.9677	803.058	73.6741	21.2305		29.1551	0.914794	3.55839	7	88.27	0	1	6.17
IND	2021	1		28.6468	0.533551											110780497	41574361	37729193	50.7263	4.95427	14.4187	1.40823	36.0702				1.48403e+07									59.3207	858.706	74.6051	21.2061		216.364	0.647884	3.26323	7	89.93	1	1	5.51
IND	2022	1		28.7167													26145295	38781970	50.9587	5.69927	14.3131	1.60079	36.6373				16049678									69.5556	866.917	87.7418	24.6446		361.043	0.809385	14.7427			1	0	6.67
IRN	2004	1	4.51	26.5007	0.314312														8.74776		28.7161			5.53644																						0	1	15.32
IRN	2005	1	7.75	26.5321	0.286011														8.82942		28.1978			5.44897														1.40536	4.4882							0	0	10.25
IRN	2006	1	-0.05	26.5809	0.282489														8.96265		27.9757			5.48859														2.73705	8.54335							0	1	12
IRN	2007	1	0.72	26.6593	0.310682														9.1935		28.1078			5.44736														4.58508	14.0182							1	0	18.41
IRN	2008	1	5.45	26.6618	0.339503														9.62941		28.8999			5.52053												34.4309	4053.62	6.08868	18.2734							1	0	25.3
IRN	2009	1	2.44	26.6718	0.33907														9.67423		28.5546			5.59421												26.349	4945.66	7.95636	23.4841							1	0	10.82
IRN	2010	1	-4.97	26.7282	0.32702														9.05413		26.3213			6.73784												29.216	3799.8	10.519	30.58							0	1	12.3
IRN	2011	1	-2.95	26.7543	0.329696											1926197600			10.333		29.5973			7.07311												29.6068	3921.96	12.6618	36.2677					1		0	0	21.53
IRN	2012	1	3.01	26.7161	0.347475											2336178400			10.5049		29.684			7.20153												38.8019	3293.26	16.3474	46.1932					1		0	0	30.57
IRN	2013	1	-3.63	26.7008	0.368976											2723822200			10.5258		29.3715			7.30861												30.1423	2653.12	18.5251	51.6931					1		0	0	34.7
IRN	2014	1	6.84	26.7494	0.370572											3728121600			11.7163		32.3072			6.43841												26.5761	2074.96	20.7354	57.1771					1		0	0	15.56
IRN	2015	1	1.3	26.7351	0.351358											4391564900			11.4946		31.335			6.43035												22.8882	1566.08	24.7851	67.5655					1		0	1	11.92
IRN	2016	1	-3.52	26.8195	0.371187											5195000000			11.747		31.6549			6.373												7.02317	1118.96	26.9678	72.6707					1		0	1	9.05
IRN	2017	1	-4.13	26.8467	0.349176											6596400000			10.726		28.5868			5.9808												5.36855	786.454	29.0859	77.5197					1		0	0	9.64
IRN	2018	1	2.47	26.8282	0.440041											7873300000			11.793		31.0918			6.13322												4.2834	488.24	33.6237	88.6476					1		0	0	30.22
IRN	2019	1	3.97	26.797	0.447777																																							1		0	1	34.62
IRN	2020	1	1.94	26.8298	0.516466																																							1		0	1	36.44
IRN	2021	1		26.8759	0.522236																																							1		1	1	40.13
IRN	2022	1		26.913																																										1	0	48.96
RUS	2004	1	8.5	27.6188	0.46984														1.98581		26.7552			0												10.8522	278.08	1.20485	16.2332							0	1	10.89
RUS	2005	1	8.7	27.6808	0.499585														2.11295		28.4316			0.000821413												20.3616	428.199	1.69577	22.818							0	0	12.69
RUS	2006	1	5.27	27.7596	0.537018														2.25574		30.3562			0.00328673												46.5039	566.321	2.41028	32.4359							0	1	9.67
RUS	2007	1	-7.87	27.8412	0.556688														2.49986		33.6378			0.0106807												73.4863	773.097	3.34625	45.0267							1	0	9.01
RUS	2008	1	4.45	27.8919	0.542264														2.64397		35.5724			0.012323			2554534									76.3681	898.219	4.58073	61.6298		242.139					1	0	14.11
RUS	2009	1	3.88	27.8107	0.575557														2.574		34.643			0.0123273			2647973									70.681	948.298	5.38125	72.4254		258.042					1	0	11.65
RUS	2010	1	3.83	27.8547	0.522268														2.60172		35.0608			0.0115202			3227570									82.677	1051.52	7.09299	95.5854		275.136					0	1	6.85
RUS	2011	1	1.52	27.8968	0.56566											2.14266e+07			2.72115		36.7453			0.00247365			3843458									123.895	1219.28	8.66442	117.001		288.889			1		0	0	8.44
RUS	2012	1	0.51	27.9362	0.509381											2.58074e+07			2.82502		38.2531			0.00413413			4494204	19.2284045389308	99.990540745638	99.9528747412527	17.478206146909	99.8644257962259	82.3197406060149	78.9466558270072	83.4468953626668	185.892	1397.44	10.4971	142.139		328.257			1		0	0	5.08
RUS	2013	1	-2.23	27.9537	0.490779											3.02709e+07			2.83552		38.5219			0.00414776			5160644									242.137	1561.83	11.5278	156.61		430.9			1		0	0	6.75
RUS	2014	1	-0.11	27.961	0.483943											37001777		6494180	2.71719		37.0371		54.0519	0.00332925			5116828									264.355	1630.54	13.6022	185.407		449.748			1		0	0	7.82
RUS	2015	1	1.59	27.9411	0.462819											39291414		7352759	2.40821		32.9268		61.3866	0			4885336									245.987	1790.49	12.6339	172.739		504.266			2		0	1	15.53
RUS	2016	1	2.67	27.943	0.508738											3.66486e+07		9938132	2.19663	1.78453	30.1329	24.4798	83.2449	0			4468880									252.498	1881.48	12.3013	168.747		494.048			2		0	1	7.04
RUS	2017	1	2.14	27.9611	0.469525	4.14495	5.11267	2.90093	12.1585	47.1376	45.9196	26.7966	78.3191	66.5043	41.2911	3.81137e+07		11156538	2.12446	2.34514	29.233	32.2695	93.7396	0			4169896									270.174	2012.51	11.9213	164.04		515.481			2		0	0	3.68
RUS	2018	1	-2.58	27.9888	0.474253											4.33201e+07		13711353	1.90171	2.24567	26.2606	31.0103	115.614	0			4214814									295.815	2002.78	11.6671	161.111		522.196			2	81.61	0	0	2.88
RUS	2019	1	5.12	28.0105	0.479031	4.8112	4.9141	2.7982	12.5236	48.44	21.83	35	77.1	68.4	69.4	4.69455e+07		16402177	2	2.16397	25.6334	29.9849	138.779	0.000846099			4738341	33.3948	99.485340423992	98.3890845372407	29.632	96.304085672283	66.3071891246257	61.3169690604311	68.5113797362764	314.613	2103.81	11.9409	165.458		554.849			2	80.78	0	1	4.47
RUS	2020	1	-1.83	27.9836	0.532501											5.23319e+07		16941587	2	2.00887	24.5896	27.965	144.008	0.000850027			5811435									332.729	2265.14	11.8481	164.934		647.615			2	81.61	0	1	3.38
RUS	2021	1		28.0382	0.529863																																							2	81.61	1	1	6.69
RUS	2022	1		28.0173																																										1	0	13.77
SAU	2004	1	-1.2	26.7702	0.331789														0.571245		7.93949															52.2504	416.429	1.90911	26.5339							0	1	0.29
SAU	2005	1	-2.08	26.8244	0.330755														0.575897		7.68089															65.4918	498.94	2.13426	28.4652							0	0	0.57
SAU	2006	1	2.23	26.8519	0.419524														0.607064		7.66267															83.2929	585.506	2.82785	35.6945							0	1	1.9
SAU	2007	1	-5.66	26.8702	0.47904														0.637301		7.62499															97.9673	618.064	3.50888	41.982							1	0	4.98
SAU	2008	1	1.72	26.9308	0.46582														0.664747		7.553															101.998	653.63	4.13688	47.0041							1	0	6.12
SAU	2009	1	7.3	26.91	0.487118														0.715917		7.73833															101.37	689.506	4.62857	50.0302							1	0	4.26
SAU	2010	1	3.12	26.9592	0.421938														0.749876		7.77166															107.818	586.365	5.06352	52.478							0	1	3.7
SAU	2011	1	0.54	27.0635	0.452696											856626			0.768948		7.72221															101.367	666.268	5.47335	54.9664							0	0	3.74
SAU	2012	1	1.58	27.1163	0.468608											1000057			0.790812		7.7261															102.034	747.171	5.91341	57.773							0	0	2.87
SAU	2013	1	2.12	27.1445	0.466402											1120520			0.824305		7.84213															94.7379	788.225	6.45814	61.4403							0	0	3.53
SAU	2014	1	-0.36	27.1839	0.490239											1250646			0.898734		8.33657															89.1365	886.744	7.21778	66.9515							0	0	2.24
SAU	2015	1	-3	27.2298	0.506904											1361629			0.929902		8.42104															107.843	946.126	8.01185	72.5541							0	1	1.21
SAU	2016	1	0.1	27.2531	0.51947											1417249			0.955021		8.43256															107.735	1090	8.32073	73.4697							0	1	2.07
SAU	2017	1	-1.93	27.2524	0.443568	3.87	5.64	0.05	9.6	59.11	53	33	66.69	70.89	60.3	1337893			0.974094		8.35658															109.523	1133.48	8.52821	73.162							0	0	-0.84
SAU	2018	1	-4.59	27.2797	0.418491											1368551																				114.345	1106.87	8.69195	72.4157		32.5364					0	0	2.46
SAU	2019	1	3.38	27.288	0.397207											1.34487e+06			0.97735		7.92314															114.706	1189.42	8.78359	71.2064		57.2535					0	1	-2.09
SAU	2020	1	7.23	27.2436	0.455973											1.38332e+06			0.948509		7.65877															115.197	1289.73	8.51239	68.7336		77.55					0	1	3.45
SAU	2021	1		27.2859	0.441992											1.81602e+06			0.916876		7.42697															110.208	1483.65	7.69599	62.3398		95.7432					1	1	3.06
SAU	2022	1		27.3692															0.908968		7.24727															123.751	1578.65	7.55969	60.274		119.983					1	0	2.47
ZHF	2004	1	4.59	26.2611	0.415087														1.25547		4.57441			7.9384														7.82382	28.5067							0	1	1.39
ZHF	2005	1	4.3	26.3126	0.434952														1.91082		6.82655			7.6276														6.71343	23.9842							0	0	3.37
ZHF	2006	1	2.03	26.3671	0.46465														2.00727		7.04305			7.5955														7.24184	25.4099							0	1	4.66
ZHF	2007	1	-2.7	26.4193	0.491681														1.6627		5.73511			7.66008														8.45609	29.1674							1	0	7.14
ZHF	2008	1	1.82	26.4507	0.508386														2.20511		7.4828			7.48559														12.2901	41.7051							1	0	11.02
ZHF	2009	1	1.87	26.4352	0.527335														2.64778		8.84323			6.78385														14.8719	49.6702							1	0	7.18
ZHF	2010	1	1.04	26.4652	0.53358														2.90003		9.53282			6.76348														16.4258	53.994							0	1	4.21
ZHF	2011	1	1.1	26.4964	0.495906											1956547			3.08881		9.99577			6.70386														17.279	55.9171					1		0	0	4.99
ZHF	2012	1	-0.17	26.52	0.501706											2135742			3.04512		9.71164			6.50948														17.5214	55.8801					1		0	0	5.65
ZHF	2013	1	-0.76	26.5446	0.511029											2266406			3.14651		9.89868			6.47032														18.1273	57.027	10.4206		0.0416127	29.4791	1		0	0	5.74
ZHF	2014	1	-0.31	26.5586	0.531852											2423835			3.43915		10.6458			6.31552														20.8064	64.4056	30.6999		0.0469769	6.58809	1		0	0	6.1
ZHF	2015	1	0.77	26.5718	0.549036											2606259			3.36496		10.1853			5.98095														22.2094	67.2252	17.2892		0.0463718	22.7373	1		0	1	4.59
ZHF	2016	1	0.29	26.5784	0.578628											2.73981e+06			3.32374		9.97585			5.56688														22.6166	67.8813	1.71411		0.0258217		2		0	1	6.33
ZHF	2017	1	-0.99	26.5899	0.586821	3.66701		3.10564		42.6084		12.8597	75.9147	85.897	55.2753	2854078			3.46223		10.3833			5.5328														22.5548	67.642					2		0	0	5.28
ZHF	2018	1	-7.48	26.6053	0.586696											2966753			3.43173		10.18			5.40669														22.615	67.086					4	76.42	0	0	4.61
ZHF	2019	1	3.87	26.6079	0.592519											3122198			3.28912		9.64006			5.33948														22.3941	65.6346					4	76.42	0	1	4.12
ZHF	2020	1	1.14	26.5464	0.576478											3102209			3.20916		9.29063			5.10949				4.71539	92.9177	93.3789	16.2986	96.4234	38.2305	24.4234	45.878			20.3942	59.0419	16.2928		0.000431894	0.215665	5	76.42	0	1	3.28
ZHF	2021	1	11.04	26.5924	0.545592											3293652			3.30891		9.47531			3.02152														18.837	53.9413	35.8325		0.014325		5	84.75	1	1	4.56
ZHF	2022	1	-4.58	26.6113															3.21163		9.10414			2.6546														17.7736	50.3836			0.0257962				1	0	6.87
UAE	2004	1	4.63	26.2373	0.343543														6.96987		15.4178																	8.4624	18.7194							0	1	5.04
UAE	2005	1	-2.19	26.2847	0.390399														7.02619		14.391																	22.1909	45.4515							0	0	6.2
UAE	2006	1	-4.02	26.3785	0.424558														7.85694		13.8471																	23.7961	41.9383							0	1	9.29
UAE	2007	1	-13.92	26.4099	0.486089														8.95522		12.9079																	28.9637	41.7476							1	0	11.13
UAE	2008	1	-13.29	26.4413	0.525398														10.5322		12.5518																	34.5396	41.1625							1	0	12.26
UAE	2009	1	-17.15	26.3874	0.533911														11.3771		11.734																	50.6759	52.2655							1	0	-4.72
UAE	2010	1	-4.23	26.4033	0.44048														12.2219		11.8645																	52.9147	51.3671							0	1	0.88
UAE	2011	1	5.77	26.4636	0.410039											1142646			12.7288		12.2688																	58.744	56.6212					0		0	0	0.88
UAE	2012	1	3.4	26.4817	0.42349											1184464			13.3061		12.7197																	63.2498	60.4625					0		0	0	0.66
UAE	2013	1	4.01	26.531	0.435758											1275544			13.8412		13.1109																	65.6716	62.2069					0		0	0	1.1
UAE	2014	1	3.42	26.5718	0.57606											1378053	136560		14.2354		13.3565					41.7052	63045									477.278	696.835	68.2484	64.0344					0		0	0	2.35
UAE	2015	1	4.11	26.6375	0.49276											1485031	197763		14.3199		13.3112					37.3075	70789									497.661	682.961	72.0783	67.001					0		0	1	4.07
UAE	2016	1	2.1	26.6916	0.467152											1574783	165689		13.9538		12.8609					43.1981	65564									530.967	736.63	73.8243	68.0423					0		0	1	1.62
UAE	2017	1	1.54	26.699	0.505115											1580301	165706		12.8696		11.7741					45.6602	92089									528.372	761.478	74.655	68.3003					0		0	0	1.97
UAE	2018	1	0.39	26.712	0.488559											1656239	145686		12.4331		11.3029					46.9014	89799									492.274	858.513	74.6691	67.8814					0		0	0	3.07
UAE	2019	1	2.61	26.723	0.493343											1758637	122221		11.1799		10.1064					42.1424	91064									533.876	942.31	71.4728	64.6096					1		0	1	-1.93
UAE	2020	1	-5.62	26.6722	0.487012											1779099	94266		9.46212		8.50668					37.3221	93070									514.052	919.495	62.2642	55.977					2		0	1	-2.08
UAE	2021	1	2.91	26.7148	0.48595											1794053	80821		9.09603		8.12888					30.0085	90563									510.029	1043.43	61.8981	55.3166					2		1	1	-0.11
UAE	2022	1	5.96	26.7904													72575		8.8989		7.897						83173									541.583	1109.1	62.3205	55.304							1	0	4.83

## Sheet: Sheet2
Y1	GDP-PER CAP-AAGR (%)		Alternative Dependent variables
LnY1	Ln GDP per capita (2015 Constant)
Y2	FINANCIAL DEVELOPMENT INDEX-FDI
Financial knowledge (K) score (0-7, high)	1.1	K	X1 FINANCIAL LITERACY
Financial behavior (B) score (0-9, high)	1.2	B
Financial attitudes (A) score (0-3, high)	1.3	A
Financial literacy (FL)score (1-21, high)	1.4	FL
Adults who actively budget/ keep track of their money (%)	1.5	PERSONAL FINANCE AWARENESS
Adults who shop around for financial products (%)	1.6
Adults who understand simple and compound interest (%)	1.7
Adults who understand the relationship between risk and return (RR) (%)	1.8	RR
Adults who understand inflation (%)	1.9	INF
Adults who understand RD (risk diversification) (%)	1.1	RD
Outstanding loans with commercial banks	2.1A	A. BREADTH OF FINANCIAL INSTITUTIONS	X2 SME CREDIT FINANCING
Commercial Bank - SME Loan Accounts	2.2A
Non-Deposit MFI Loan Accounts	2.3A
# of commercial bank branches per 1000 Km2	2.4B	B. DEPTH OF FINANCIAL INSTITUTIONS-BRANCHES
# of MFI branches per 1000 Km2	2.5B
# of commercial bank branches per 100,000 Adults	2.6B
# of MFI branches per 100,000 Adults	2.7B
# of loan accounts from all MFI per 1000 adults	2.8B
# of branches of other deposit takers (ODT) per 100,000 Adults	2.9B
SME deposit accounts (as a % of non-financial corporation (NFC) borrowers)	2.10C	C. SME ACCESS TO CREDIT
SME loan accounts (as a % of NFC borrowers)	2.11C
Outstanding SME Loan - Commercial Banks	2.12C
SMEs with an outstanding loan or line of credit (%)	2.13C
SMEs with a male owner with an account at a formal financial institution (%)	2.14C
SMEs with an account at a formal financial institution (%)	2.15C
SMEs with at least one female owner with an outstanding loan or line of credit (%)	2.16D	D. FEMALE SME SHARE
SMEs with at least one female owner with an account at a formal financial institution (%)	2.17D
SMEs with outstanding credit who are required to provide collateral on loans (%)	2.18E	E. SME CREDIT LIMITATIONS
SMEs with at least one female owner with outstanding credit who are required to provide collateral on loans (%)	2.19E
SMEs with a male owner with outstanding credit who are required to provide collateral on loans (%)	2.20E
# credit cards per 1000 adults	3.1	CC	X3 Digital Money - Service & Regulation
# debit cards per 1000 adults	3.2	DC
# of ATMs per 1000 Km2	3.3	ATM
# of ATMs per 100,000 Adults	3.4
Registered mobile money agents (MMA) per 100,000 adults	3.5	MMA
Value of Mobile & Internet Bank Transactions (during reference year) (%GDP)	3.6	DIGITAL TRANSACTIONS
Value of MMA Transactions (during reference year) (%GDP)	3.7
Average # of MMA Transactions per active MMA	3.8
Mobile Money Deployment (# of active services)	3.9
Mobile Money regulatory index (0-100)	3.1	REG
EC=Z1	ECONOMIC CRISIS EVENTS		Zi MACRO FACTORS & EVENTS
PE=Z2	PANDEMIC EVENTS
CPI=Z3	INFLATION
